# Supplementary material
Source: PubMed Central journal article supplement (PMC2630185)
Supplement: NIHMS65226-supplement-01.pdf [file NIHMS65226-supplement-01.pdf]

## Supplemental Data

### S-Nitrosylation of $\beta$ -Arrestin Regulates $\beta$ -Adrenergic Receptor Trafficking

Kentaro Ozawa, Erin J. Whalen, Christopher D. Nelson, Yuanyu Mu, Douglas T. Hess, Robert J. Lefkowitz, and Jonathan S. Stamler

#### *Supplemental Methods*

*Materials:* Anti-eNOS and anti-clathrin HC antibodies were from Santa Cruz Biotechnology (Santa Cruz, CA). Anti- $\beta$ -adaptin antibody was from Pharmingen (San Diego, CA). Anti- $\beta$ -arrestin 2 antibody (A2CT) has been described previously (Attramadal et al., 1992). All other reagents were from Sigma unless otherwise noted.

*Plasmids:* pcDNA3, 1-FLAG- $\beta$ 2AR, pcDNA3- $\beta$ -arrestin1-FLAG, pcDNA3- $\beta$ -arrestin2-FLAG and pcDNA3- $\beta$ -arrestin2-FLAG truncated forms (encoding rat-arrestins) were as described (Nelson et al., 2007). pcDNA3-eNOS was generated by amplification out of a human cDNA library, and cloned into pDNR-CMV (Clontech, CA) at EcoRI and XbaI sites. Clathrin and  $\beta$ -adaptin (AP-2) constructs were obtained from Dr. Marc Caron (Duke University, Durham NC).

*Cysteine mutants and truncated forms of  $\beta$ -arrestin 2:* To generate single cysteine mutants (C405A, C410N, C410R, C410P, C410M, C410F, C410A and C410S), cysteine residues of the wild-type protein were individually changed to alanine/serine or other (N,R,P,M,F) using the QuickChange XL site-directed kit (Stratagene, La Jolla, CA) and appropriate primers. Truncated forms of  $\beta$ -arrestin 2 were amplified by PCR using appropriate primers, and fragments were inserted into the p3XFLAG-CMV<sup>TM</sup>-14 expression vector (Sigma-Aldrich, St. Louis, MO).

*Cell culture and transfection:* Cells were maintained in Dulbecco's modified Eagle's medium supplemented with 10% fetal bovine serum (FBS), 100 U/ml penicillin and 100 µg/ml streptomycin at 37°C in a humidified 5% CO<sub>2</sub> atmosphere. Cells were transfected at ~ 80% confluency using LipofectAMINE2000 (Invitrogen: Carlsbad, CA) according to the manufacturer's instructions. HEK cell lines stably overexpressing the FLAG-β<sub>2</sub>AR or FLAG-AT<sub>1A</sub>R were as described (Whalen et al., 2007). The HEK-eNOS line was obtained from William Sessa (Yale University, New Haven CT). HUVECs (passages 2-8) were obtained from the Duke Cell Culture Facility.

*siRNA:* Pre-designed siRNA for eNOS was purchased from Dharmacon (Dharmacon, Inc., Lafayette, CO) and control siRNA was purchased from Santa Cruz (Santa Cruz, CA). ≈40% confluent cells in 6 cm dishes were transfected with siRNA using the INTERFERin siRNA transfection reagent (Polyplus-transfection Inc., New York, NY) according to manufacturer's instructions. Transfection with β-arrestin 2 (3 µg), clathrin (1.5 µg) and β-adaptin (1.5 µg) was at 48 hr after transfection of siRNA, and harvesting and immunoprecipitation analysis was at 96 hr.

*Immunoprecipitation and immunoblotting:* Cells were washed with PBS, solubilized in 1 ml of lysis buffer (20 mM Hepes, 150 mM NaCl, 10% glycerol (v/v), 1.0% Nonidet P-40 (v/v) and 2 mM EDTA) containing a protease inhibitor cocktail (Sigma; St. Louis, MO), and then clarified by centrifugation. For the determination of protein expression, 50 µl of each clarified whole-cell lysate was resolved by SDS-PAGE. Immunoprecipitation was performed using monoclonal M2 anti-FLAG-affinity agarose (Sigma), or anti-FLAG, anti-eNOS, anti-clathrin, anti-β-adaptin or anti-β-arrestin 2 antibodies, with constant agitation for 2 hours at 4°C. Immune complexes were washed three times with lysis buffer and then eluted using 3XFLAG peptide (anti-FLAG agarose or anti-FLAG antibody) or sample buffer. Immunoprecipitated proteins were resolved by SDS-PAGE and then transferred to a polyvinylidene difluoride membrane for immunodetection.

*Statistical Analysis:* Data were analyzed using paired and unpaired Student's t-tests.

*Supplemental Figures*

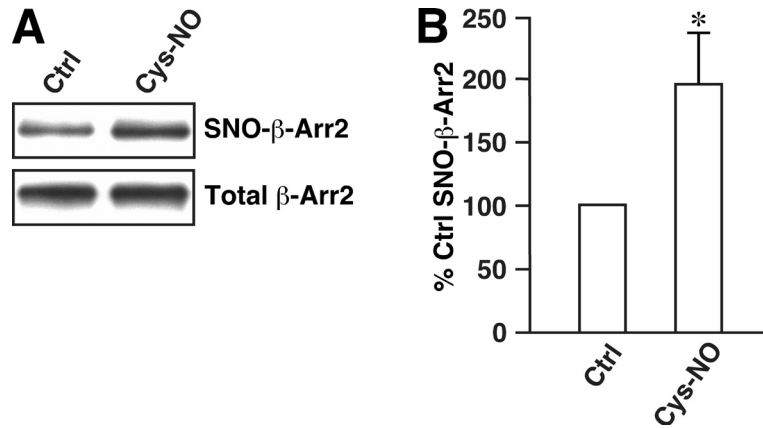

**Supplemental Figure 1. S-nitrosylation of β-arrestin 2 by Cys-NO in HEK-eNOS cells.** (A) HEK-eNOS cells transfected with FLAG-tagged β-arrestin 2 were treated with either saline or Cys-NO (50 μM, 10 min.), and lysates were analyzed by biotin-switch for SNO-β-arrestin 2 (ascorbate-dependent labeling). (B) A histogram presents the results of semiquantitative analysis, in which the amount of SNO-β-arrestin 2 is represented as a percentage of SNO-β-arrestin 2 in control cells and normalized with respect to the level of total β-arrestin 2. Data are means ± SE (n = 3); \*P < 0.05 re. wild-type.

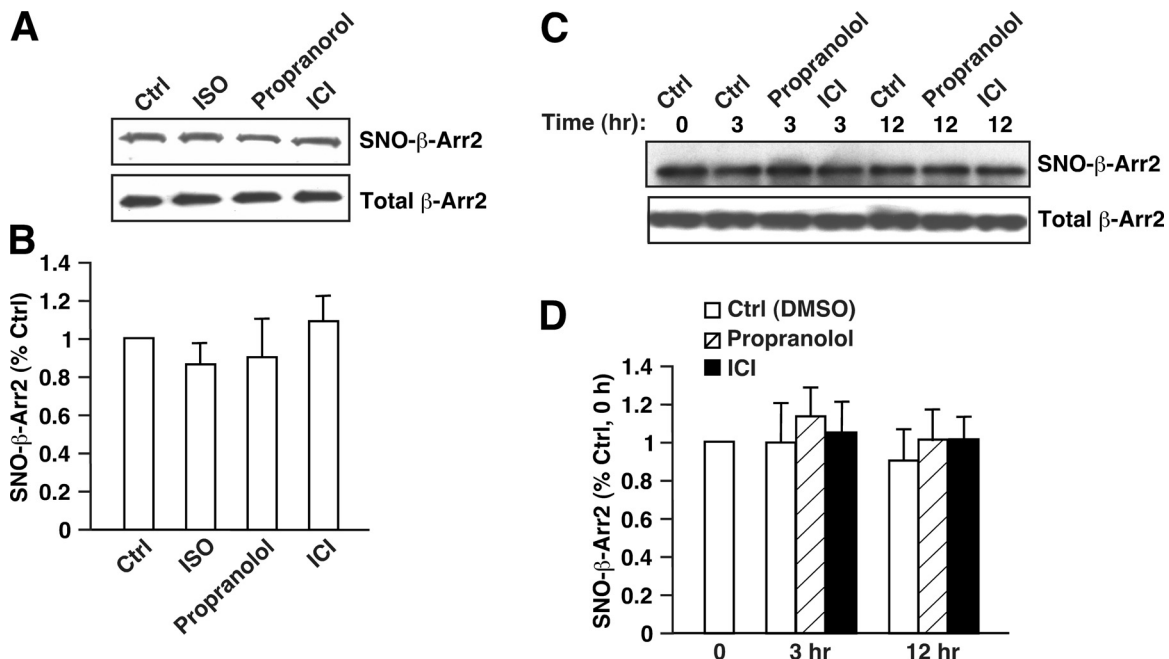

**Supplemental Figure 2. Effect of agonist, antagonist and inverse agonist on basal  $\beta$ -arrestin 2 S-nitrosylation in HEK-eNOS cells.** (A) Western blot showing effects of isoproterenol (ISO), propranolol and ICI 118,551 treatment (10 $\mu$ M, 10 min), on basal SNO- $\beta$ -arrestin 2 in HEK-eNOS cells. (B) A histogram presents the results of semiquantitative analysis, in which the amount of SNO- $\beta$ -arrestin 2 is represented as a percentage of SNO- $\beta$ -arrestin 2 in control cells and normalized with respect to the level of total  $\beta$ -arrestin 2. Data are means  $\pm$  SE (n = 3); no significant differences. (C) Western blot shows the effects of ISO, propranolol and ICI 118,551 treatment (10 $\mu$ M) for the times indicated on basal SNO- $\beta$ -arrestin 2 in HEK-eNOS cells. (D) A histogram presents the results of semiquantitative analysis, in which the amount of SNO- $\beta$ -arrestin 2 is represented as a percentage of SNO- $\beta$ -arrestin 2 in control cells and normalized with respect to the level of total  $\beta$ -arrestin 2. Data are means  $\pm$  SE (n = 3); no significant differences.

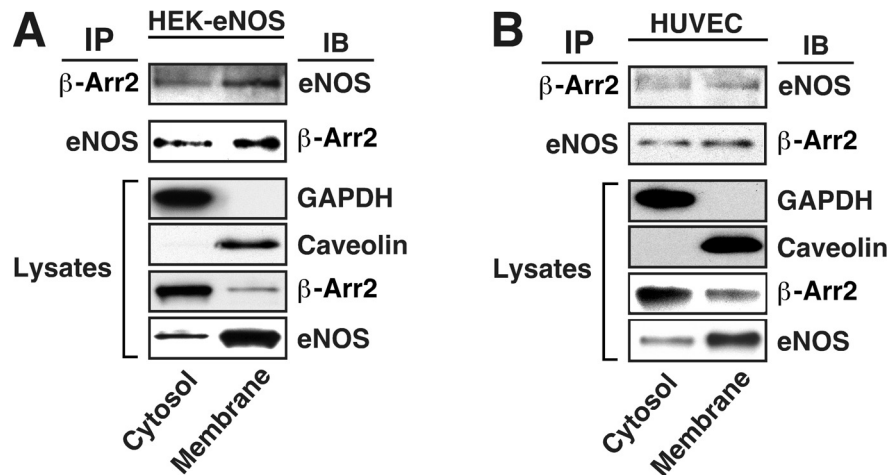

**Supplemental Figure 3. Subcellular localization of the  $\beta$ -arrestin 2/eNOS interaction.** (A) HEK-eNOS cells and (B) human umbilical vein endothelial cells (HUVEC) were transfected with FLAG-tagged  $\beta$ -arrestin 2, and separated into cytosolic and membrane fractions (indicated by the cytosolic marker GAPDH and membrane-localized caveolin). Each fraction (Lysates) was western blotted with anti-GAPDH, anti-caveolin, anti-eNOS or anti-FLAG antibody ( $\beta$ -Arr2), and was immunoprecipitated with anti-eNOS or anti-FLAG antibody followed by immunoblot with anti-FLAG or anti-eNOS antibody respectively.

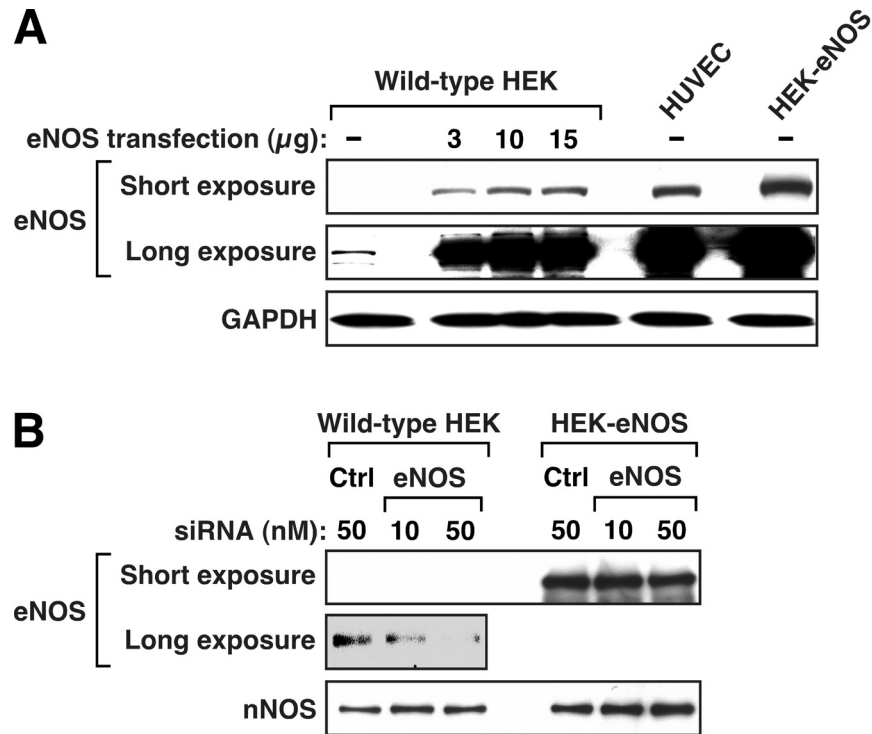

**Supplemental Figure 4. Efficiency of eNOS expression following transfection of wild-type HEK cells and of siRNA-mediated silencing of eNOS expression in eNOS-HEK and wild-type HEK cells.** (A) Western blots of lysates show expression of eNOS in wild-type HEK cells transfected with vector alone or with increasing amounts of eNOS plasmid, and in human umbilical vein endothelial cells (HUVEC) and HEK-eNOS cells (equal protein loading). (B) Western blots illustrate the efficiency of siRNA mediated silencing of eNOS in both wild-type HEK (complete or near complete silencing) and HEK-eNOS cells (minimal silencing). In (A) and (B), short and long exposure refer to blot exposure times.

**Expression controls (western blots)**

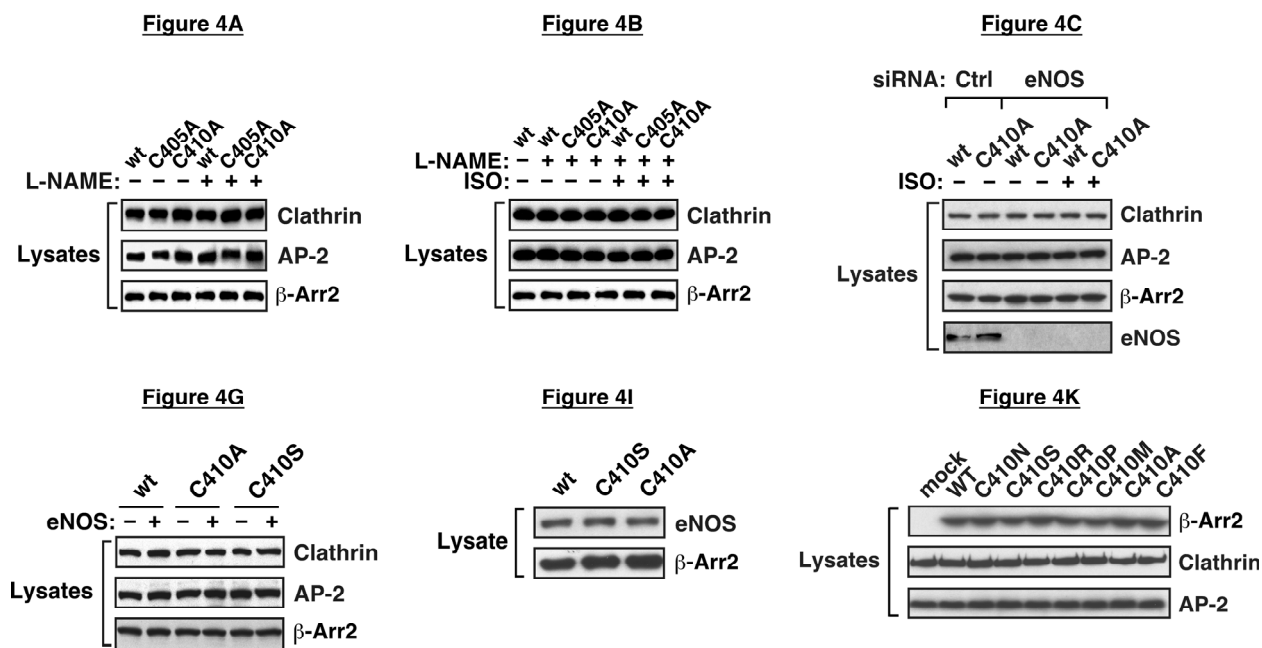

**Supplemental Figure 5. Expression controls for Figure 4.** Western blots demonstrate equal expression of clathrin, AP-2 and β-arrestin 2 across lysates employed for immunoprecipitation in Fig. 4A-C, G, I and K.

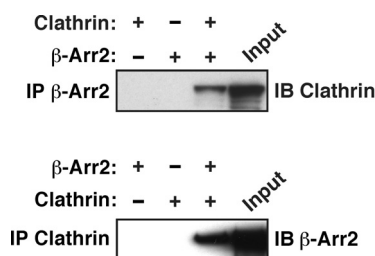

**Supplemental Figure 6. Binding of purified β-arrestin 2 and clathrin *in vitro*.** Incubation (4°C, 12 hr) of purified clathrin (300nM; Sigma) with wild-type β-arrestin 2 (300 nM; purified as in Fig. 2) was followed by immunoprecipitation with the anti-β-arrestin 2 antiserum A2CT or with anti-clathrin antibodies. Immunoprecipitates and purified clathrin or β-arrestin 2 (input) were analyzed by western blotting with anti-clathrin or anti-β-arrestin antibodies, respectively.

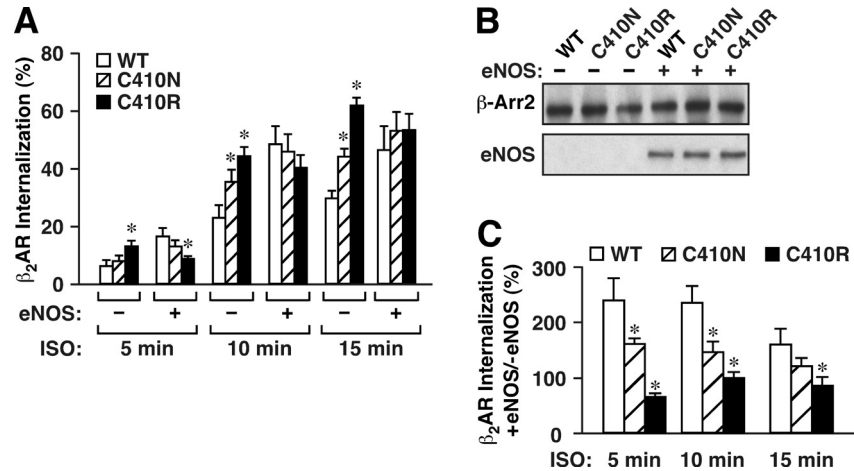

**Supplemental Figure 7. Effects of  $\beta$ -arrestin C410N and C410R mutations on eNOS-potentiated internalization of the  $\beta_2$ AR** (A) HEK- $\beta_2$ AR cells were transfected with wild-type, C410N or C410R  $\beta$ -arrestin 2 and internalization of  $\beta_2$ AR was quantified by flow cytometry following stimulation by isoproterenol (ISO, 10  $\mu$ M) for the indicated times, with or without transient overexpression of eNOS. Data are means  $\pm$  SE (n = 6); \*P < 0.05 re. wild-type. (B) Western blot of wild-type, C410N and C410R  $\beta$ -arrestin 2, as well as eNOS, showing comparable expression across groups. (C) A histogram summarizing the results shown in (A). Data are means  $\pm$  SE (n = 6); \*P < 0.05 re. wild-type.

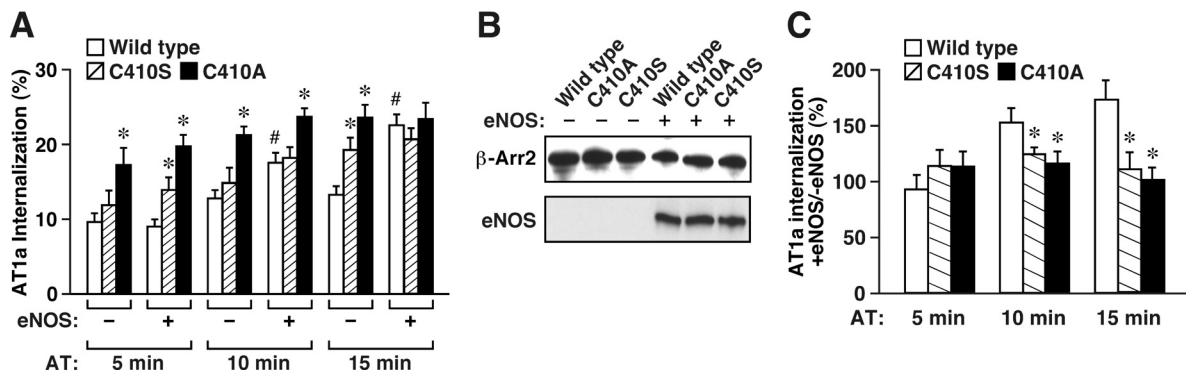

**Supplemental Figure 8. S-nitrosylation of  $\beta$ -arrestin 2 facilitates ligand-induced AT1 angiotensin receptor internalization.** (A) HEK cells overexpressing the angiotensin 1A receptor (HEK-AT<sub>1A</sub>R cells) were transfected with wild-type, C410A or C410S  $\beta$ -arrestin 2 and internalization of AT<sub>1A</sub>R was quantified by flow cytometry following stimulation by angiotensin II (AT, 100 nM) for the indicated times in the presence or absence of transiently overexpressed

eNOS. Data are means  $\pm$  SE (n = 6); \*P < 0. 05 re. wild-type and # indicates P < 0. 01 re. -eNOS vs. +eNOS at each time point. (B) Western blot of wild-type, C410A or C410S  $\beta$ -arrestin 2, and of eNOS, showing comparable expression between groups. (C) A histogram summarizing the results shown in (A). Data are means  $\pm$  SE (n = 8); \*P < 0. 05 re. wild-type.

### ***Supplemental References***

Attramadal, H., Arriza, J. L., Aoki, C., Dawson, T. M., Codina, J., Kwatra, M. M., Snyder, S. H., Caron, M. G., and Lefkowitz, R. J. (1992).  $\beta$ -arrestin2, a novel member of the arrestin/ $\beta$ -arrestin gene family. *J Biol Chem* 267, 17882-17890.

Whalen, E. J., Foster, M. W., Matsumoto, A., Ozawa, K., Violin, J. D., Que, L. G., Nelson, C. D., Benhar, M., Keys, J. R., Rockman, H. A., *et al.* (2007). Regulation of  $\beta$ -adrenergic receptor signaling by S-nitrosylation of G-protein-coupled receptor kinase 2. *Cell* 129, 511-522.
